# Supplementary material for: Glutamine Modulates Expression and Function of Glucose 6-Phosphate Dehydrogenase via NRF2 in Colon Cancer Cells
Source: MDPI journal article supplement (doi:10.3390/antiox10091349), 2021-08-25
Supplement: s1 [file s1]

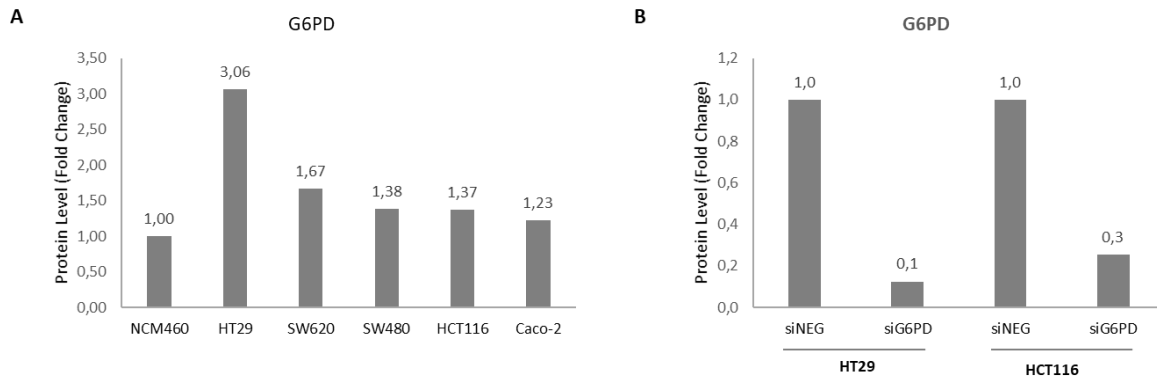

### Supplementary Figure S1. Intensity ratio of western blots

Intensity ratio of each band on the western blot was calculated using ImageJ® Software (public domain National Institutes of Health, USA, <http://rsbweb.nih.gov/ij/>) and normalized to its corresponding  $\beta$ -actin. A: Intensity ratios of G6PD in 6 colon cancer cell lines. Fold change is calculated considering the NCM460 cell line as control. B: Intensity ratios of G6PD in HT29 and HCT116 cells after treatment of siNEG or siRNA targeting 6PGD and relative to siNEG condition.

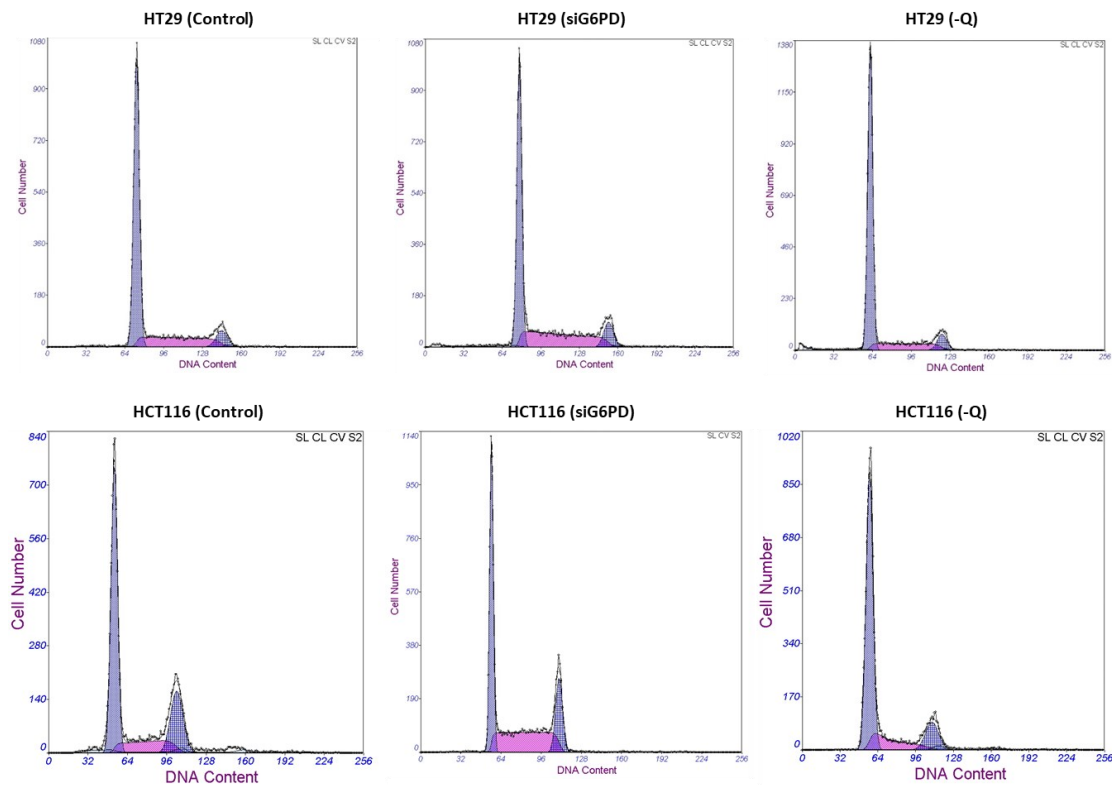

### Supplementary Figure S2. Cell Cycle Histograms

Cell cycle analysis was performed using a Beckman Coulter® Epics® XLTM Flow Cytometer with a cut-off at  $1 \times 10^4$  cells. The cell cycle distribution analysis was done using FlowJo® software to obtain the percentage of cells in G1, S, and G2 phases. One example of each condition is shown.

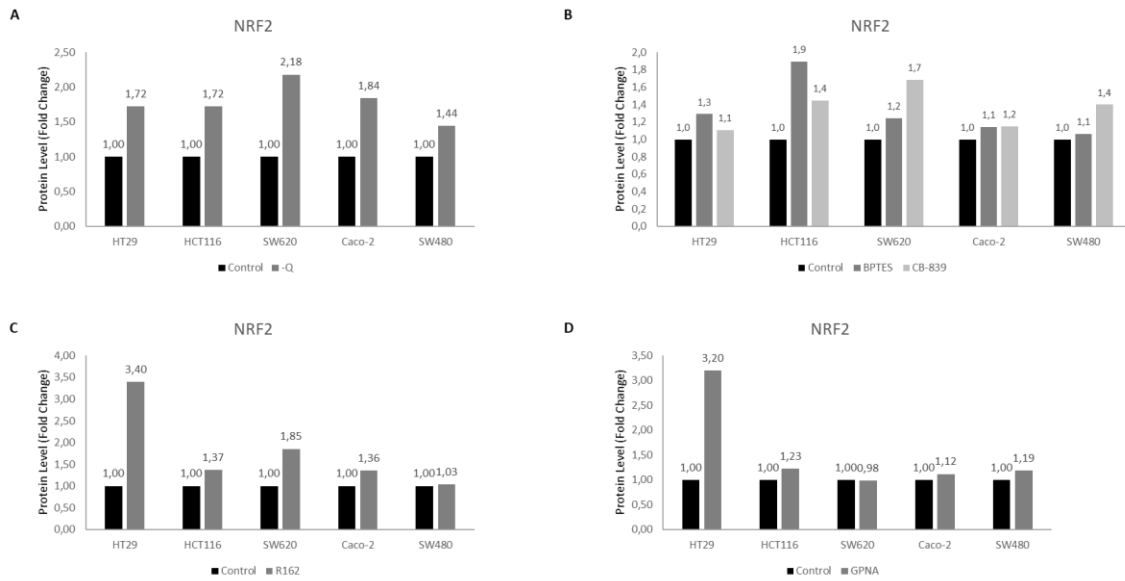

### Supplementary Figure S3. Intensity ratio of western blots

Intensity ratio of each band on the western blot was calculated using ImageJ® Software (public domain National Institutes of Health, USA, <http://rsbweb.nih.gov/ij/>) and normalized to its corresponding  $\beta$ -actin. Intensity ratios of NRF2 in 5 colon cancer cell lines A: upon glutamine deprivation; B: upon glutaminase inhibition; C; upon glutamate dehydrogenase inhibition and D: upon glutamine transporter inhibition. Fold changes were calculated considering non-treated cells as control.
